# Supplementary material for: Reliability and Performance of the Online Literature Database CAMbase after Changing from a Semantic Search to a Score Ranking Algorithm
Source: Springer Nature journal article supplement (doi:10.1007/s42979-023-02146-9), 2023-09-09
Supplement: 42979_2023_2146_MOESM1_ESM.xlsx [file 42979_2023_2146_MOESM1_ESM.xlsx]

## Sheet: Data (AND)
Database	v2.0								v3.0 (AND)
Restriction	All words		Abstract		Title		Keywords		All words		Abstract		Title		Keywords
Search phrase	Hits	Time	Hits	Time	Hits	Time	Hits	Time	Hits	Time	Hits	Time	Hits	Time	Hits	Time
Acupressure	59	0	15	0	46	0	4	0	60	2	13	1	47	2	4	1
Acupuncture	1614	10	500	10	1086	10	498	0	1620	2	424	3	1088	3	371	3
Alexander Technique	9	0	4	0	5	0	1	0	13	2	3	2	253	5	0
Aroma Therapy	5	20	2	20	0		3	20	4	1	1	1	0		2	1
Arts Therapy	249	20	90	20	62	20	8	20	683	2	287	3	178	3	4	1
Autogenes Training	66	10	34	10	24	0	18	0	100	3	71	2	31	1	19	2
Ayurvedic traditional medicine	11	20	10	10	0		1	10	11	2	9	2	0		1	1
Bach-Blüten-Therapie	6	0	4	10	1	10	2	10	6	1	4	2	1	2	1	1
Balneotherapy	93	0	52	0	39	0	28	0	93	2	27	1	39	2	28	1
Bee products	5	0	4	0	1	0	1	0	5	1	0		1	2	1	2
Biofeedback	240	0	122	0	113	0	106	0	233	2	114	2	112	3	103	1
Chinese traditional medicine	301	20	183	20	57	20	75	10	310	3	169	3	65	2	59	3
Chiropractic	164	0	41	0	112	0	67	0	167	2	38	2	112	2	47	1
Color therapy	17	20	9	30	0		3	30	18	2	7	1	0		1	1
craniosacral manipulation	1	0	1	0	0		0		1	1	1	1	0		0
Diet therapy	98	30	72	20	0		16	20	132	3	61	2	1	1	8	2
Electric stimulation therapy	40	20	15	20	0		19	30	39	2	5	1	0		2	1
Electromagnatic Therapy	21	30	17	20	1	20	4	20	22	5	13	5	1	1	1	2
Feldenkrais Method	4	10	3	10	3	10	1	0	8	1	4	2	6	1	0
Grüner Tee	14	0	6	0	6	0	4	0	18	2	7	2	10	2	2	1
Herbal supplements	28	0	22	0	4	0	5	0	33	2	16	1	8	1	5	2
Homeopathy	756	0	369	0	229	0	280	0	760	2	188	2	228	2	262	2
Hydrotherapy	71	0	50	0	19	0	30	0	72	2	21	2	19	1	26	1
Hypnosis	140	0	91	0	53	0	20	0	145	2	87	2	55	2	16	1
Kinesiologie	75	10	15	0	38	0	39	0	80	2	15	2	37	2	32	1
Krebs	1857	10	207	0	379	0	1365	0	1820	4	210	3	346	3	904	4
light therapy	102	20	84	30	7	20	3	20	109	3	70	3	7	1	3	2
Magnetic field therapy	20	30	10	20	2	20	10	20	33	2	12	2	4	2	10	4
Massage	425	0	281	0	144	0	132	0	530	2	359	3	141	3	112	2
Meditation	149	0	91	0	60	0	50	0	141	2	88	2	57	2	38	1
Morita therapy	2	20	1	20	0		0		1	1	1	1	0		0
Moxibustion	43	0	16	0	27	0	13	0	43	2	17	1	28	1	10	1
Naturopathy	138	0	84	0	17	0	72	0	137	2	43	2	17	2	68	1
Osteopathic manipulation	7	0	3	0	2	0	1	0	8	2	0		2	1	0
Ozone therapy	33	30	25	20	5	20	18	20	35	2	15	2	6	1	15	2
Yoga	86	10	37	0	43	0	21	0	86	2	36	4	42	2	20	2

## Sheet: Data (OR)
Database	v2.0								v3.0 (OR)
Restriction	All words		Abstract		Title		Keywords		All words		Abstract		Title		Keywords
Search phrase	Hits	Time	Hits	Time	Hits	Time	Hits	Time	Hits	Time	Hits	Time	Hits	Time	Hits	Time
Acupressure	59	0	15	0	46	0	4	0	50	1	9	0	41	1	4	0
Acupuncture	1614	10	500	10	1086	10	498	0	1338	3	334	1	891	2	373	1
Alexander Technique	9	0	4	0	5	0	1	0	1718	2	1272	2	253	2	17	1
Aroma Therapy	5	20	2	20	0		3	20	7097	4	3173	3	2705	2	1163	2
Arts Therapy	249	20	90	20	62	20	8	20	8706	4	4437	3	3158	2	1181	2
Autogenes Training	66	10	34	10	24	0	18	0	1786	2	1309	3	488	2	156	1
Ayurvedic traditional medicine	11	20	10	10	0		1	10	5237	4	2458	2	1340	2	776	2
Bach-Blüten-Therapie	6	0	4	10	1	10	2	10	3	0	1	10	1	0	1	0
Balneotherapy	93	0	52	0	39	0	28	0	77	1	23	1	33	1	28	1
Bee products	5	0	4	0	1	0	1	0	1117	2	834	2	233	1	120	1
Biofeedback	240	0	122	0	113	0	106	0	202	1	80	1	84	1	103	1
Chinese traditional medicine	301	20	183	20	57	20	75	10	5571	2	2696	3	1516	3	814	2
Chiropractic	164	0	41	0	112	0	67	0	140	1	28	1	102	1	47	1
Color therapy	17	20	9	30	0		3	30	7217	3	3249	2	2759	2	1168	2
craniosacral manipulation	1	0	1	0	0		0		315	1	183	1	138	1	21	1
Diet therapy	98	30	72	20	0		16	20	7667	4	3449	3	2807	2	1328	2
Electric stimulation therapy	40	20	15	20	0		19	30	8153	5	3956	3	3059	3	1230	2
Electromagnatic Therapy	21	30	17	20	1	20	4	20	7087	3	3165	3	2705	2	1161	2
Feldenkrais Method	4	10	3	10	3	10	1	0	6049	3	4927	3	968	2	83	1
Grüner Tee	14	0	6	0	6	0	4	0	178	1	96	2	48	1	10	1
Herbal supplements	28	0	22	0	4	0	5	0	1163	2	580	2	422	1	203	2
Homeopathy	756	0	369	0	229	0	280	0	601	2	128	1	179	1	264	2
Hydrotherapy	71	0	50	0	19	0	30	0	56	1	15	0	11	1	26	1
Hypnosis	140	0	91	0	53	0	20	0	104	1	55	1	38	1	16	1
Kinesiologie	75	10	15	0	38	0	39	0	54	1	9	1	28	1	32	1
Krebs	1857	10	207	0	379	0	1365	0	1190	2	150	1	217	1	901	1
light therapy	102	20	84	30	7	20	3	20	7719	6	3727	2	2771	2	1171	3
Magnetic field therapy	20	30	10	20	2	20	10	20	8467	4	4252	3	2949	3	1218	3
Massage	425	0	281	0	144	0	132	0	421	1	271	1	105	1	107	1
Meditation	149	0	91	0	60	0	50	0	106	1	51	1	41	1	38	1
Morita therapy	2	20	1	20	0		0		7089	3	3166	2	2706	2	1162	3
Moxibustion	43	0	16	0	27	0	13	0	33	1	14	1	21	1	9	0
Naturopathy	138	0	84	0	17	0	72	0	106	1	27	1	11	1	68	1
Osteopathic manipulation	7	0	3	0	2	0	1	0	416	1	189	1	178	3	26	1
Ozone therapy	33	30	25	20	5	20	18	20	7170	4	3227	4	2743	2	1171	3
Yoga	86	10	37	0	43	0	21	0	68	1	24	0	32	1	19	1
